# Supplementary material
Source: MDPI journal article supplement (https://www.mdpi.com/2227-9717/9/12/2124)
Supplement: s1 [file s1]

## **Supporting Information**

**Molten-salt-assisted synthesis of nitrogen-doped carbon nanosheets derived from biomass waste of ginkgo shells as efficient catalyst for oxygen reduction reaction**

**Wei Hong <sup>1,†</sup>, Xia Wang <sup>1,†</sup>, Hongying Zheng <sup>1</sup>, Rong Li <sup>1,\*</sup>, Rui Wu <sup>2,\*</sup> and Junsong Chen <sup>2,\*</sup>**

Table S1 Comparison of electrocatalytic ORR performance between N-pC and state-of-the-art metal-free catalysts reported in the literatures in alkaline electrolyte.

| Electrocatalysts | $E_{1/2}$ (V vs. RHE) | $E_{\text{onset}}$ (V vs. RHE) | $J_d$ (mA·cm <sup>-2</sup> ) | Ref.             |
|------------------|-----------------------|--------------------------------|------------------------------|------------------|
| <b>N-pC</b>      | <b>0.863</b>          | <b>1.020</b>                   | <b>5.93</b>                  | <b>This work</b> |
| CN-nanosh (suc)  | 0.764                 | ~0.914                         | 5.56                         | 1                |
| NPCTC            | 0.88                  | 0.99                           | 5.43                         | 2                |
| NPCTC-850        | 0.83                  | 0.92                           | 5.35                         | 3                |
| NDGs-800         | 0.85                  | 0.98                           | 5.6                          | 4                |
| NrGO800          | 0.76                  | 0.88                           | 4.0                          | 5                |
| IRnG-A2          | ~0.744                | 0.844                          | 3.11                         | 6                |
| OAB-N            | ~0.851                | 1.00                           | ~5.51                        | 7                |
| NB-CN            | 0.835                 | 0.92                           | ~4.9                         | 8                |

Table S2 Comparison of the performance of primary Zn-air batteries assembled with various cathodic electrocatalysts.

| Electrocatalysts | OCV (V)    | Power density<br>(mW·cm <sup>-2</sup> ) | Specific capacity<br>(mAh·g <sup>-1</sup> ) | Ref.             |
|------------------|------------|-----------------------------------------|---------------------------------------------|------------------|
| <b>N-pC</b>      | <b>1.5</b> | <b>223</b>                              | <b>755</b>                                  | <b>This work</b> |
| CN-nanosh (suc)  | 1.46       | 201.33                                  | 740                                         | 1                |
| 1100-CNS         | 1.49       | 151                                     | -                                           | 9                |
| NDGs-800         | 1.45       | 115.2                                   | 750.8                                       | 4                |
| NPCTC-850        | 1.47       | 74                                      | 730                                         | 3                |
| P, S-CNS         | 1.51       | 198                                     | 830                                         | 10               |
| PS-CNF           | 1.49       | 231                                     | 698                                         | 11               |
| FeCo@MNC         | 1.41       | 115                                     | -                                           | 12               |
| CoNi/BCF         | 1.44       | 155.1                                   | 710.9                                       | 13               |
| NGM-Co           | 1.44       | 152                                     | 750                                         | 14               |

## References

- [1] Yang, X.-K.; Chen, A.L.; Yi, Q.-F. Easy preparation of N-doped graphene-like nanosheets as excellent metal-free cathodic electrocatalysts of Zn-air battery. *Chinese Journal of Inorganic Chemistry* 2021, *37*, 157-170.
- [2] Wang, Y.; Zhou, J.; He, Y.; Liu, Y.; Xu, C. Highly performed nitrogen-doped porous carbon electrocatalyst for oxygen reduction reaction prepared by a simple and slight regulation in hydrolyzing process of ZIF-8. *Journal of Solid State Chemistry* 2021, *302*, 122415.
- [3] Wang, Q.; Ji, Y.; Lei, Y.; Wang, Y.; Wang, Y.; Li, Y.; Wang, S. Pyridinic-N-dominated doped defective graphene as a superior oxygen electrocatalyst for ultrahigh-energy-density Zn-Air batteries. *ACS Energy Letters* 2018, *3*, 1183.
- [4] Li, Y.; Yan, Z.; Wang, Q.; Ye, H.; Li, M.; Zhu, L.; Cao, X. Ultrathin, highly branched carbon nanotube cluster with outstanding oxygen electrocatalytic performance. *Electrochimica Acta* 2018, *282*, 224-232.
- [5] Lemes, G.; Sebastian, D.; Pastor, E.; Lazard, M.J. N-doped graphene catalysts with high nitrogen concentration for the oxygen reduction reaction. *Journal of Power Sources* 2019, *438*, 227036.
- [6] Lee, M.S.; Whang, D.R.; Choi, H.-J.; Yang, M.H.; Kim, B.-G.; Baek, J.-B.; Chang, D.W. A facile approach to tailoring electrocatalytic activities of imine-rich nitrogen-doped graphene for oxygen reduction reaction. *Carbon* 2017, *122*, 515-523.
- [7] Si, Y.; Park, M.G.; Cano, Z.P.; Xiong, Z.; Chen, Z. Heavily nitrogen-doped acetylene black as a high-performance catalyst for oxygen reduction reaction. *Carbon* 2017, *117*, 12-19.
- [8] Lu, Z.; Wang, J.; Huang, S.; Hou, Y.; Li, Y.; Zhao, Y.; Mu, S.; Zhang, J.; Zhao, Y. N,B-codoped defect-rich graphitic carbon nanocages as high performance multifunctional electrocatalysts. *Nano Energy* 2017, *42*, 334-340.
- [9] Pei, Z.; Li, H.; Huang, Y.; Xue, Q.; Huang, Y.; Zhu, M.; Wang, Z.; Zhi, C. Texturing in situ: N, S-enriched hierarchically porous carbon as a highly active

reversible oxygen electrocatalyst. *Energy & Environmental Science* 2017, *10*, 742-749.

- [10] Shinde, S.S.; Lee, C.-H.; Sami, A.; Kim, D.-H.; Lee, S.-U.; Lee, J.-H. Scalable 3-D carbon nitride sponge as an efficient metal-free bifunctional oxygen electrocatalyst for rechargeable Zn-air batteries. *ACS Nano* 2017, *11*, 347-357.
- [11] Shinde, S.S.; Yu, J.-Y.; Song, J.-W.; Nam, Y.-H.; Kim, D.-H.; Lee, J.-H. Highly active and durable carbon nitride fibers as metal-free bifunctional oxygen electrodes for flexible Zn-air batteries. *Nanoscale Horizons* 2017, *2*, 333-341.
- [12] Li, C.; Wu, M.; Liu, R. High-performance bifunctional oxygen electrocatalysts for zinc-air batteries over mesoporous Fe/Co-N-C nanofibers with embedding FeCo alloy nanoparticles. *Applied Catalysis B-Environmental* 2019, *244*, 150-158.
- [13] Wan, W.; Liu, X.; Li, H.; Peng, X.; Xi, D.; Luo, J. 3D carbon framework-supported CoNi nanoparticles as bifunctional oxygen electrocatalyst for rechargeable Zn-air batteries. *Applied Catalysis B-Environmental* 2019, *240*, 193-200.
- [14] Tang, C.; Wang, B.; Wang, H.-F.; Zhang, Q. Defect engineering toward atomic Co-N-x-C in hierarchical graphene for rechargeable flexible solid Zn-Air batteries. *Advanced Materials* 2017, *29*, 1703185.
